# Supplementary material for: Structural and thermodynamic aspects of water–carbonate exchange equilibrium for MIII/IV–EDTA–carbonate systems
Source: Royal Society of Chemistry journal article supplement (doi:10.1039/c8qi01062e), 2018-11-27
Supplement: c8qi01062e1.pdf [file c8qi01062e1.pdf]

## Electronic Supplementary Information

|                   |                                                                                                                                                                                                                                                                                                                                                                                                                                                                                               |           |
|-------------------|-----------------------------------------------------------------------------------------------------------------------------------------------------------------------------------------------------------------------------------------------------------------------------------------------------------------------------------------------------------------------------------------------------------------------------------------------------------------------------------------------|-----------|
| <b>Table S1.</b>  | Selected structural data of I and Ia.....                                                                                                                                                                                                                                                                                                                                                                                                                                                     | <b>2</b>  |
| <b>Table S2.</b>  | Crystal field levels and the crystal field splitting ( $\Delta_{\text{CFs}}$ ) in $\text{cm}^{-1}$ of the selected multiplets for $4f^{11}$ configuration in I and Ia at 4.2 K .....                                                                                                                                                                                                                                                                                                          | <b>3</b>  |
| <b>Table S3.</b>  | Oscillator strengths ( $P \cdot 10^8$ ) and $\Omega_\lambda$ parameter values for I and Ia crystals ( $P$ values of hypersensitive transitions are in bold).....                                                                                                                                                                                                                                                                                                                              | <b>4</b>  |
| <b>Table S4.</b>  | The calculated and experimental concentrations (in M) of the species existing in solutions of Er(III)-EDTA-carbonate system (where $[\text{ML}] = [\text{Er}(\text{EDTA})(\text{H}_2\text{O})_2]$ , $[\text{MLA}] = [\text{Er}(\text{EDTA})(\text{CO}_3)]$ , $[\text{MLOH}] = [\text{Er}(\text{EDTA})(\text{OH})(\text{H}_2\text{O})_2]$ ).....                                                                                                                                               | <b>6</b>  |
| <b>Table S5.</b>  | Experimental data taken for calculations of energy bonding $\Delta E$ .....                                                                                                                                                                                                                                                                                                                                                                                                                   | <b>9</b>  |
| <b>Table S6.</b>  | Empirical parameters used for $\text{p}K_1$ and $\text{p}K_2$ calculations of carbonic acid at $\mu_{\text{KCl}} = 3.5 \text{ M}$ ( $4.0 \text{ mol} \cdot \text{kg}^{-1}$ ) and $\text{p}K_w$ for $\text{H}_2\text{O}$ at different temperatures.....                                                                                                                                                                                                                                        | <b>11</b> |
| <b>Table S7.</b>  | Experimental values of quantities determined from UV-vis measurements of Er(III)-EDTA-carbonate solutions at different temperatures used to calculate the $\Delta G$ , $\Delta H$ and $\Delta S$ values of $[\text{Er}(\text{EDTA})(\text{CO}_3)]^{3-}$ complex formation (where $[\text{ML}] = [\text{Er}(\text{EDTA})(\text{H}_2\text{O})_2]$ , $[\text{MLA}] = [\text{Er}(\text{EDTA})(\text{CO}_3)]$ , $[\text{MLOH}] = [\text{Er}(\text{EDTA})(\text{OH})(\text{H}_2\text{O})_2]$ )..... | <b>12</b> |
| <b>Figure S1.</b> | The UV-vis NIR spectra of I at RT and 4.2 K.....                                                                                                                                                                                                                                                                                                                                                                                                                                              | <b>5</b>  |
| <b>Figure S2.</b> | The $^4I_{15/2} \rightarrow ^2H_{11/2}$ and $^4I_{15/2} \rightarrow ^4S_{3/2}$ spectra of pure aqueous species: $[\text{Er}(\text{EDTA})(\text{H}_2\text{O})_2]^-$ , $[\text{Er}(\text{EDTA})(\text{OH})(\text{H}_2\text{O})_2]^{2-}$ and $[\text{Er}(\text{EDTA})(\text{H}_2\text{O})_2]^{3-}$ derived from the factor analysis used for quantitative analysis of solutions.....                                                                                                             | <b>8</b>  |
| <b>Figure S3.</b> | Absorption spectra of Er-EDTA-carbonate systems at different temperatures and pH. The spectra at low temperature (283K) are marked in blue. The highest temperature spectra (333K) are marked in red.....                                                                                                                                                                                                                                                                                     | <b>10</b> |
|                   | References.....                                                                                                                                                                                                                                                                                                                                                                                                                                                                               | <b>13</b> |

**Table S1.** Selected structural data of I and Ia

|                                                                                                                | I                                                                 | Ia                                                                 |
|----------------------------------------------------------------------------------------------------------------|-------------------------------------------------------------------|--------------------------------------------------------------------|
| Chemical formula                                                                                               | C <sub>14</sub> H <sub>32</sub> ErN <sub>11</sub> O <sub>12</sub> | C <sub>16</sub> H <sub>46</sub> N <sub>14</sub> O <sub>19</sub> Th |
| M <sub>r</sub>                                                                                                 | 713.76                                                            | 970.71                                                             |
| Crystal system                                                                                                 | Monoclinic, <i>P2<sub>1</sub>/n</i>                               | Monoclinic, <i>P2<sub>1</sub>/c</i>                                |
| T / K                                                                                                          | 100                                                               | 100                                                                |
| <i>a</i> , <i>b</i> , <i>c</i> (Å), β                                                                          | 14.749(3), 10.683(2), 15.594(3),<br>92.30(2)°                     | 18.525 (4), 8.827 (1),<br>21.485 (4), 104.50 (2)                   |
| <i>V</i> (Å <sup>3</sup> )                                                                                     | 2455.2(1)                                                         | 3401.3 (1)                                                         |
| <i>Z</i>                                                                                                       | 4                                                                 | 4                                                                  |
| <i>M</i> / mm <sup>-1</sup>                                                                                    | 3.50                                                              | 4.48                                                               |
| Crystal size / mm                                                                                              | 0.31 × 0.20 × 0.07                                                | 0.41 × 0.35 × 0.03                                                 |
| No. of measured, independent and observed [ <i>I</i> > 2σ( <i>I</i> )] reflections                             | 16035, 5980, 4940                                                 | 15646, 7886, 6252                                                  |
| R <sub>int</sub>                                                                                               | 0.038                                                             | 0.043                                                              |
| (sin θ/λ) <sub>max</sub> (Å <sup>-1</sup> )                                                                    | 0.650                                                             | 0.681                                                              |
| <i>R</i> [ <i>F</i> <sup>2</sup> > 2σ( <i>F</i> <sup>2</sup> )], <i>wR</i> ( <i>F</i> <sup>2</sup> ), <i>S</i> | 0.038, 0.104, 1.06                                                | 0.041, 0.101, 0.99                                                 |
| No. of reflections                                                                                             | 5630                                                              | 7886                                                               |
| No. of parameters                                                                                              | 351                                                               | 481                                                                |
| Δρ <sub>max</sub> , Δρ <sub>min</sub> (e Å <sup>-3</sup> )                                                     | 2.06, -1.22                                                       | 3.26, -1.90                                                        |

**Table S2.** Crystal field levels and the crystal field splitting ( $\Delta_{CFS}$ ) in  $\text{cm}^{-1}$  of the selected multiplets for  $4f^{11}$  configuration in I and Ia<sup>1</sup> at 4.2 K

|                                | [ErEDTA(CO <sub>3</sub> )] <sup>3-</sup> | [ErEDTA(H <sub>2</sub> O) <sub>2</sub> ] <sup>-</sup> |                                | [ErEDTA(CO <sub>3</sub> )] <sup>3-</sup> | [ErEDTA(H <sub>2</sub> O) <sub>2</sub> ] <sup>-</sup> |
|--------------------------------|------------------------------------------|-------------------------------------------------------|--------------------------------|------------------------------------------|-------------------------------------------------------|
| <sup>4</sup> G <sub>11/2</sub> | 26524                                    | 26596                                                 | <sup>4</sup> I <sub>9/2</sub>  | 12653                                    | 12685                                                 |
|                                | 26494                                    | 26560                                                 |                                | 12646                                    | 12659                                                 |
|                                | 26440                                    | 26511                                                 |                                | 12613                                    | 12555                                                 |
|                                | 26353                                    | 26417                                                 |                                | 12491                                    | 12470                                                 |
|                                | 26288                                    | 26330                                                 |                                | 12454                                    | 12392                                                 |
|                                | 26272                                    | 26309                                                 |                                | 12384                                    |                                                       |
| $\Delta_{CFS}$                 | <b>252</b>                               | <b>287</b>                                            | $\Delta_{CFS}$                 | <b>269</b>                               | <b>293</b>                                            |
| <sup>4</sup> F <sub>7/2</sub>  | 20603                                    | 20659                                                 | <sup>4</sup> I <sub>11/2</sub> | 10312                                    | 10362                                                 |
|                                | 20578                                    | 20612                                                 |                                | 10283                                    | 10352                                                 |
|                                | 20570                                    | 20587                                                 |                                | 10259                                    | 10339                                                 |
|                                | 20527                                    | 20534                                                 |                                | 10239                                    | 10313                                                 |
|                                | 20484                                    |                                                       |                                |                                          | 10292                                                 |
| $\Delta_{CFS}$                 | <b>119</b>                               | <b>125</b>                                            | $\Delta_{CFS}$                 | <b>73</b>                                | <b>70</b>                                             |
| <sup>2</sup> H <sub>11/2</sub> | 19283                                    | 19340                                                 | <sup>4</sup> I <sub>13/2</sub> | 6774                                     | 6823                                                  |
|                                | 19241                                    | 19298                                                 |                                | 6752                                     | 6787                                                  |
|                                | 19223                                    | 19281                                                 |                                | 6733                                     | 6749                                                  |
|                                | 19173                                    | 19225                                                 |                                | 6722                                     | 6681                                                  |
|                                | 19125                                    | 19163                                                 |                                | 6709                                     | 6649                                                  |
|                                | 19092                                    | 19126                                                 |                                | 6663                                     | 6585                                                  |
| $\Delta_{CFS}$                 | <b>191</b>                               | <b>214</b>                                            | 6628                           | 6577                                     |                                                       |
| <sup>4</sup> S <sub>3/2</sub>  | 18428                                    | 18450                                                 | $\Delta_{CFS}$                 | 6569                                     |                                                       |
|                                | 18417                                    | 18424                                                 |                                | 6556                                     |                                                       |
|                                | 18371                                    |                                                       |                                | <b>218</b>                               | <b>246</b>                                            |
| $\Delta_{CFS}$                 | <b>57</b>                                | <b>26</b>                                             |                                |                                          |                                                       |
| <sup>4</sup> F <sub>9/2</sub>  | 15430                                    | 15479                                                 |                                |                                          |                                                       |
|                                | 15421                                    | 15408                                                 |                                |                                          |                                                       |
|                                | 15361                                    | 15370                                                 |                                |                                          |                                                       |
|                                | 15323                                    | 15316                                                 |                                |                                          |                                                       |
|                                | 15278                                    | 15278                                                 |                                |                                          |                                                       |
|                                | 15254                                    |                                                       |                                |                                          |                                                       |
| $\Delta_{CFS}$                 | <b>179</b>                               | <b>201</b>                                            |                                |                                          |                                                       |

**Table S3.** Oscillator strengths ( $P \cdot 10^8$ ) and  $\Omega_\lambda$  parameter values for I and Ia crystals ( $P$  values of hypersensitive transitions are in bold)

| $^4I_{15/2} \rightarrow$                     | $[\text{Er}(\text{EDTA})(\text{CO}_3)]^{3-}$ |                              | $[\text{Er}(\text{EDTA})(\text{H}_2\text{O})_2]^-$ |                              |
|----------------------------------------------|----------------------------------------------|------------------------------|----------------------------------------------------|------------------------------|
|                                              | $P_{\text{exp}} \cdot 10^8$                  | $P_{\text{calc}} \cdot 10^8$ | $P_{\text{exp}} \cdot 10^8$                        | $P_{\text{calc}} \cdot 10^8$ |
| $(^2\text{H}, ^2\text{G})_{9/2}$             | 50.5                                         | 35.4                         | 55.6                                               | 19.4                         |
| $^2\text{K}_{15/2}, ^2\text{G}_{7/2}$        | 131.1                                        | 108.0                        | 132.1                                              | 112.6                        |
| $^4\text{G}_{9/2}$                           | 210.7                                        | 171.2                        | 103.8                                              | 129.6                        |
| <b><math>^4\text{G}_{11/2}</math></b>        | <b>1368.9</b>                                | 1403.2                       | <b>700.4</b>                                       | 663.1                        |
| $(^2\text{G}, ^4\text{F}, ^2\text{H})_{9/2}$ | 84.5                                         | 749.5                        | 79.8                                               | 101.8                        |
| $^4\text{F}_{3/2}, ^4\text{F}_{5/2}$         | 106.1                                        | 99.1                         | 139.3                                              | 136.6                        |
| $^4\text{F}_{7/2}$                           | 211.6                                        | 221.6                        | 258.0                                              | 257.0                        |
| <b><math>^2\text{H}_{11/2}</math></b>        | <b>852.6</b>                                 | 792.4                        | <b>308.4</b>                                       | 375.5                        |
| $^4\text{S}_{3/2}$                           | 75.2                                         | 51.9                         | 61.4                                               | 71.3                         |
| $^4\text{F}_{9/2}$                           | 215.7                                        | 248.9                        | 226.5                                              | 210.6                        |
| $^4\text{I}_{9/2}$                           | 42.2                                         | 43.7                         | 17.6                                               | 25.5                         |
| $^4\text{I}_{11/2}$                          | 46.6                                         | 64.8                         | 77.6                                               | 76.8                         |
| $\Omega_2 \cdot 10^{20} / \text{cm}^2$       |                                              | 4.96 $\pm$ 0.14              |                                                    | 2.11 $\pm$ 0.24              |
| $\Omega_4 \cdot 10^{20} / \text{cm}^2$       |                                              | 2.14 $\pm$ 0.11              |                                                    | 1.17 $\pm$ 0.37              |
| $\Omega_6 \cdot 10^{20} / \text{cm}^2$       |                                              | 1.40 $\pm$ 0.19              |                                                    | 1.93 $\pm$ 0.22              |
| rms $\cdot 10^7$                             |                                              | 3.21                         |                                                    | 3.19                         |

#### Intensity of f-f transitions for I and Ia

The Judd-Ofelt<sup>2,3</sup> intensity analysis of f-f transitions was used for determination of  $\Omega_\lambda$  parameters (Eqn 13 in Experimental section in the main text)

Among three  $\Omega_\lambda$  parameters, the  $\Omega_2$  values are strongly influenced by the hypersensitive transitions intensities. This parameter is particularly sensitive to the polarizability of the coordinated ligands,<sup>4</sup> covalent<sup>5</sup>, and vibronic effects,<sup>6</sup> while  $\Omega_4$  and  $\Omega_6$  are rather dependent on covalent interactions, the crystal field effects<sup>7</sup> as well as rigidity of the system.<sup>8</sup> The substitution of water molecules by more polarizable, bidentate  $\text{CO}_3^{2-}$  anion brings about a significant increase in intensities of the hypersensitive  $^4I_{15/2} \rightarrow ^4\text{G}_{11/2}$  and  $^4I_{15/2} \rightarrow ^2\text{H}_{11/2}$  transitions, as well as  $\Omega_2$  and  $\Omega_4$  parameter values. The polarizability of  $\text{CO}_3^{2-}$  anion ( $\alpha_{\text{CO}_3} = 3.85 \text{ \AA}^3$ ) is about 2.7 times higher than this of water ( $\alpha_{\text{H}_2\text{O}} = 1.442 \text{ \AA}^3$ ).<sup>9</sup> The  $\Omega_6$  parameter value is smaller in I than in Ia and it is probably because of higher rigidity<sup>9</sup> of  $[\text{Er}(\text{EDTA})(\text{CO}_3)]^{3-}$  complex in comparison with the hydrated  $[\text{Er}(\text{EDTA})(\text{H}_2\text{O})_2]^-$  one as it was shown in crystal structure section.

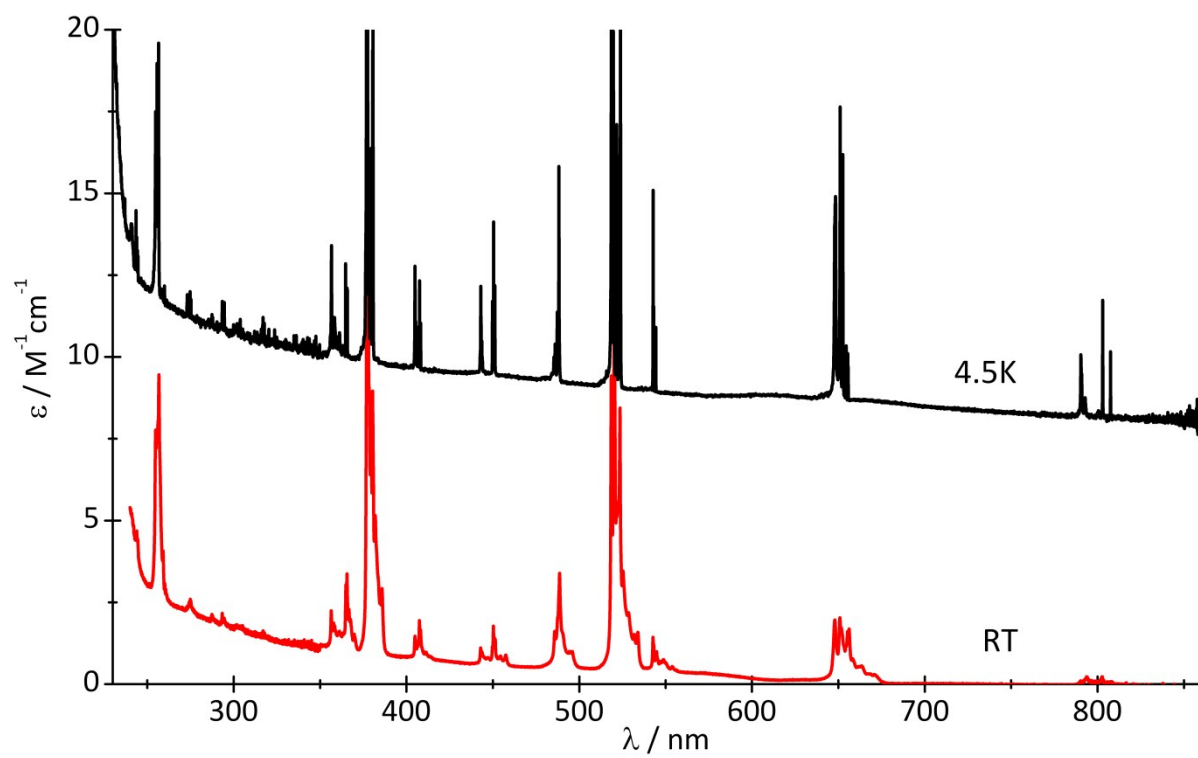

**Figure S1.** The UV-vis NIR spectra of I at RT and 4.2 K.

**Table S4.** The calculated and experimental concentrations (in M) of the species existing in solutions of Er(III)-EDTA-carbonate system (where [ML] = [Er(EDTA)(H<sub>2</sub>O)<sub>2</sub>], [MLA] = [Er(EDTA)(CO<sub>3</sub>)], [MLOH] = [Er(EDTA)(OH)(H<sub>2</sub>O)<sub>2</sub>])

| pH    | A <sub>tot</sub> | ML <sub>tot</sub> | [ML] <sub>calc</sub> | [ML] <sub>exp</sub> | [MLA] <sub>calc</sub> | [MLA] <sub>exp</sub> | [MLOH] <sub>calc</sub> | [MLOH] <sub>exp</sub> | [A]      |
|-------|------------------|-------------------|----------------------|---------------------|-----------------------|----------------------|------------------------|-----------------------|----------|
| 6.98  | 6.853E-03        | 2.980E-02         | 2.85E-02             | 2.78E-02            | 1.32E-03              | 1.63E-03             | 0                      | 0                     | 1.06E-05 |
| 6.87  | 1.367E-02        | 2.971E-02         | 2.77E-02             | 2.70E-02            | 2.04E-03              | 2.49E-03             | 0                      | 0                     | 1.68E-05 |
| 6.86  | 2.045E-02        | 2.963E-02         | 2.67E-02             | 2.58E-02            | 2.90E-03              | 3.52E-03             | 0                      | 0                     | 2.47E-05 |
| 6.89  | 2.719E-02        | 2.955E-02         | 2.56E-02             | 2.46E-02            | 3.97E-03              | 4.57E-03             | 0                      | 0                     | 3.53E-05 |
| 6.91  | 3.389E-02        | 2.947E-02         | 2.45E-02             | 2.35E-02            | 4.98E-03              | 5.65E-03             | 0                      | 0                     | 4.63E-05 |
| 6.94  | 4.056E-02        | 2.939E-02         | 2.33E-02             | 2.23E-02            | 6.10E-03              | 6.73E-03             | 0                      | 0                     | 5.97E-05 |
| 6.97  | 4.719E-02        | 2.931E-02         | 2.21E-02             | 2.12E-02            | 7.23E-03              | 7.60E-03             | 0                      | 0                     | 7.47E-05 |
| 7.04  | 5.378E-02        | 2.923E-02         | 2.03E-02             | 1.98E-02            | 8.92E-03              | 9.09E-03             | 0                      | 0                     | 1.00E-04 |
| 7.07  | 6.034E-02        | 2.915E-02         | 1.90E-02             | 1.85E-02            | 1.01E-02              | 1.02E-02             | 0                      | 0                     | 1.21E-04 |
| 7.12  | 6.687E-02        | 2.907E-02         | 1.75E-02             | 1.72E-02            | 1.16E-02              | 1.14E-02             | 0                      | 0                     | 1.51E-04 |
| 7.14  | 7.336E-02        | 2.899E-02         | 1.64E-02             | 1.61E-02            | 1.26E-02              | 1.24E-02             | 0                      | 0                     | 1.74E-04 |
| 7.19  | 7.981E-02        | 2.892E-02         | 1.49E-02             | 1.48E-02            | 1.40E-02              | 1.37E-02             | 0                      | 0                     | 2.13E-04 |
| 7.24  | 9.261E-02        | 2.876E-02         | 1.29E-02             | 1.30E-02            | 1.59E-02              | 1.53E-02             | 0                      | 0                     | 2.81E-04 |
| 7.29  | 1.053E-01        | 2.861E-02         | 1.10E-02             | 1.16E-02            | 1.76E-02              | 1.65E-02             | 0                      | 0                     | 3.62E-04 |
| 7.34  | 1.178E-01        | 2.846E-02         | 9.43E-03             | 9.95E-03            | 1.90E-02              | 1.80E-02             | 0                      | 0                     | 4.60E-04 |
| 7.41  | 1.302E-01        | 2.831E-02         | 7.75E-03             | 8.38E-03            | 2.05E-02              | 1.93E-02             | 0                      | 0                     | 6.04E-04 |
| 7.47  | 1.425E-01        | 2.816E-02         | 6.45E-03             | 7.25E-03            | 2.17E-02              | 2.04E-02             | 0                      | 0                     | 7.67E-04 |
| 7.52  | 1.546E-01        | 2.801E-02         | 5.45E-03             | 6.23E-03            | 2.26E-02              | 2.13E-02             | 0                      | 0                     | 9.44E-04 |
| 7.58  | 1.785E-01        | 2.772E-02         | 4.20E-03             | 4.61E-03            | 2.35E-02              | 2.24E-02             | 0                      | 0                     | 1.28E-03 |
| 7.68  | 2.020E-01        | 2.744E-02         | 3.01E-03             | 3.64E-03            | 2.44E-02              | 2.31E-02             | 0                      | 0                     | 1.85E-03 |
| 7.76  | 2.474E-01        | 2.689E-02         | 2.03E-03             | 2.25E-03            | 2.49E-02              | 2.39E-02             | 0                      | 0                     | 2.79E-03 |
| 7.89  | 2.911E-01        | 2.636E-02         | 1.27E-03             | 1.35E-03            | 2.51E-02              | 2.43E-02             | 0                      | 0                     | 4.50E-03 |
| 7.99  | 3.734E-01        | 2.537E-02         | 7.56E-04             | 6.44E-04            | 2.46E-02              | 2.40E-02             | 0                      | 0                     | 7.41E-03 |
| 10.00 | 6.947E-03        | 2.980E-02         | 1.90E-02             | 2.01E-02            | 6.83E-03              | 7.85E-03             | 3.94E-03               | 2.27E-03              | 8.18E-05 |
| 9.11  | 1.389E-02        | 2.971E-02         | 1.62E-02             | 1.65E-02            | 1.31E-02              | 1.38E-02             | 4.33E-04               | 0.00E+00              | 1.84E-04 |
| 8.77  | 1.667E-02        | 2.968E-02         | 1.48E-02             | 1.48E-02            | 1.47E-02              | 1.54E-02             | 1.80E-04               | 8.14E-06              | 2.27E-04 |
| 8.56  | 2.112E-02        | 2.963E-02         | 1.25E-02             | 1.25E-02            | 1.70E-02              | 1.75E-02             | 9.42E-05               | 2.74E-04              | 3.09E-04 |
| 8.49  | 2.557E-02        | 2.958E-02         | 1.04E-02             | 1.04E-02            | 1.91E-02              | 1.95E-02             | 6.66E-05               | 2.70E-04              | 4.18E-04 |
| 8.49  | 3.001E-02        | 2.953E-02         | 8.36E-03             | 8.27E-03            | 2.11E-02              | 2.15E-02             | 5.35E-05               | 2.12E-04              | 5.76E-04 |
| 8.55  | 3.446E-02        | 2.947E-02         | 6.31E-03             | 6.35E-03            | 2.31E-02              | 2.33E-02             | 4.64E-05               | 9.55E-05              | 8.35E-04 |
| 8.64  | 3.891E-02        | 2.942E-02         | 4.52E-03             | 4.66E-03            | 2.49E-02              | 2.50E-02             | 4.09E-05               | 2.34E-04              | 1.25E-03 |
| 8.84  | 4.446E-02        | 2.936E-02         | 2.56E-03             | 2.33E-03            | 2.68E-02              | 2.69E-02             | 3.67E-05               | 0.00E+00              | 2.38E-03 |
| 9.13  | 5.558E-02        | 2.923E-02         | 1.01E-03             | 6.82E-04            | 2.82E-02              | 2.84E-02             | 2.82E-05               | 5.88E-05              | 6.37E-03 |
| 9.32  | 6.947E-02        | 2.907E-02         | 4.98E-04             | 2.44E-04            | 2.86E-02              | 2.86E-02             | 2.15E-05               | 8.87E-05              | 1.31E-02 |
| 9.50  | 0                | 2.953E-02         | 2.77E-02             | 2.77E-02            | 0                     | 0                    | 1.82E-03               | 7.07E-04              | 0        |
| 9.73  | 0                | 2.949E-02         | 2.65E-02             | 2.67E-02            | 0                     | 0                    | 2.95E-03               | 1.58E-03              | 0        |
| 9.87  | 0                | 2.946E-02         | 2.55E-02             | 2.59E-02            | 0                     | 0                    | 3.92E-03               | 2.51E-03              | 0        |
| 9.97  | 0                | 2.943E-02         | 2.47E-02             | 2.49E-02            | 0                     | 0                    | 4.77E-03               | 3.26E-03              | 0        |
| 10.05 | 0                | 2.940E-02         | 2.39E-02             | 2.39E-02            | 0                     | 0                    | 5.54E-03               | 4.26E-03              | 0        |
| 10.16 | 0                | 2.935E-02         | 2.26E-02             | 2.24E-02            | 0                     | 0                    | 6.76E-03               | 5.77E-03              | 0        |
| 10.28 | 0                | 2.928E-02         | 2.10E-02             | 2.04E-02            | 0                     | 0                    | 8.29E-03               | 7.42E-03              | 0        |
| 10.43 | 0                | 2.919E-02         | 1.87E-02             | 1.76E-02            | 0                     | 0                    | 1.04E-02               | 1.03E-02              | 0        |
| 10.59 | 0                | 2.909E-02         | 1.61E-02             | 1.49E-02            | 0                     | 0                    | 1.30E-02               | 1.30E-02              | 0        |
| 10.74 | 0                | 2.900E-02         | 1.36E-02             | 1.22E-02            | 0                     | 0                    | 1.54E-02               | 1.59E-02              | 0        |
| 10.89 | 0                | 2.890E-02         | 1.11E-02             | 9.55E-03            | 0                     | 0                    | 1.78E-02               | 1.85E-02              | 0        |
| 11.11 | 0                | 2.879E-02         | 7.85E-03             | 6.64E-03            | 0                     | 0                    | 2.09E-02               | 2.15E-02              | 0        |
| 11.33 | 0                | 2.870E-02         | 5.29E-03             | 4.34E-03            | 0                     | 0                    | 2.34E-02               | 2.36E-02              | 0        |
| 11.58 | 0                | 2.861E-02         | 3.22E-03             | 2.58E-03            | 0                     | 0                    | 2.54E-02               | 2.55E-02              | 0        |
| 11.81 | 0                | 2.852E-02         | 1.98E-03             | 1.47E-03            | 0                     | 0                    | 2.65E-02               | 2.64E-02              | 0        |
| 12.66 | 2.551E-02        | 2.906E-02         | 0                    | 0                   | 1.14E-02              | 1.04E-02             | 1.75E-02               | 1.82E-02              | 1.41E-02 |
| 12.67 | 2.832E-02        | 2.900E-02         | 0                    | 0                   | 1.22E-02              | 1.12E-02             | 1.67E-02               | 1.74E-02              | 1.61E-02 |
| 12.68 | 3.111E-02        | 2.890E-02         | 0                    | 0                   | 1.28E-02              | 1.20E-02             | 1.59E-02               | 1.64E-02              | 1.83E-02 |
| 12.69 | 3.391E-02        | 2.878E-02         | 0                    | 0                   | 1.34E-02              | 1.27E-02             | 1.52E-02               | 1.56E-02              | 2.04E-02 |
| 12.71 | 3.669E-02        | 2.869E-02         | 0                    | 0                   | 1.39E-02              | 1.34E-02             | 1.47E-02               | 1.48E-02              | 2.28E-02 |
| 12.72 | 3.947E-02        | 2.853E-02         | 0                    | 0                   | 1.43E-02              | 1.39E-02             | 1.41E-02               | 1.42E-02              | 2.51E-02 |
| 12.73 | 4.224E-02        | 2.838E-02         | 0                    | 0                   | 1.47E-02              | 1.44E-02             | 1.36E-02               | 1.35E-02              | 2.75E-02 |
| 12.74 | 4.570E-02        | 2.808E-02         | 0                    | 0                   | 1.51E-02              | 1.50E-02             | 1.28E-02               | 1.26E-02              | 3.05E-02 |
| 12.75 | 4.915E-02        | 2.779E-02         | 0                    | 0                   | 1.55E-02              | 1.55E-02             | 1.22E-02               | 1.17E-02              | 3.36E-02 |
| 12.76 | 5.327E-02        | 2.722E-02         | 0                    | 0                   | 1.57E-02              | 1.59E-02             | 1.14E-02               | 1.06E-02              | 3.75E-02 |
| 12.77 | 5.875E-02        | 2.668E-02         | 0                    | 0                   | 1.61E-02              | 1.65E-02             | 1.05E-02               | 9.69E-03              | 4.26E-02 |
| 12.78 | 6.421E-02        | 2.668E-02         | 0                    | 0                   | 1.66E-02              | 1.71E-02             | 9.96E-03               | 9.09E-03              | 4.75E-02 |
| 12.80 | 7.235E-02        | 2.668E-02         | 0                    | 0                   | 1.73E-02              | 1.81E-02             | 9.34E-03               | 8.10E-03              | 5.50E-02 |
| 12.82 | 8.312E-02        | 2.668E-02         | 0                    | 0                   | 1.80E-02              | 1.94E-02             | 8.62E-03               | 6.79E-03              | 6.51E-02 |
| 12.83 | 9.646E-02        | 2.668E-02         | 0                    | 0                   | 1.89E-02              | 2.04E-02             | 7.76E-03               | 5.82E-03              | 7.75E-02 |
| 12.83 | 1.097E-01        | 2.668E-02         | 0                    | 0                   | 1.97E-02              | 2.23E-02             | 6.97E-03               | 3.99E-03              | 8.99E-02 |

For calculations of species concentrations the following equations have been used:

$$\beta_{\text{OH}} = \frac{[\text{MLOH}]}{[\text{ML}] \cdot [\text{OH}]} \quad (1)$$

$$\beta_{(\text{A})} = \frac{[\text{MLA}]}{[\text{ML}] \cdot [\text{A}]} \quad (2)$$

$$\beta_{(\text{B})} = \frac{[\text{MLA}] \cdot [\text{OH}]}{[\text{MLOH}] \cdot [\text{A}]} \quad (3)$$

For carbonic acid  $\text{H}_2\text{CO}_3$  the following protonation constants were defined:

$$K_1 = \frac{[\text{HA}]}{[\text{H}] \cdot [\text{A}]} \quad (4)$$

$$K_2 = \frac{[\text{H}_2\text{A}]}{[\text{H}]^2 \cdot [\text{A}]} \quad (5)$$

$$K_{\text{W}} = [\text{H}] \cdot [\text{OH}] \quad (6)$$

where  $\text{M} = \text{Er}$ ;  $\text{L} = \text{EDTA}$ ,  $\text{A} = \text{CO}_3^{2-}$

$$\text{ML}_{\text{tot}} = [\text{ML}] + [\text{MLOH}] + [\text{MLA}] \quad (7)$$

$$\text{A}_{\text{tot}} = [\text{A}] + [\text{MLA}] + [\text{HA}] + [\text{H}_2\text{A}] \quad (8)$$

Combination of dependences 1 - 8 gives the quadratic equation (9):

$$[\text{ML}]^2 \cdot \{\beta_2 + \beta_1\beta_2[\text{OH}]\} + [\text{ML}] \cdot \{-\beta_2\text{ML}_{\text{tot}} + 1 + K_1[\text{H}] + K_2[\text{H}]^2 + \beta_1[\text{OH}] + \beta_1K_1K_{\text{W}} + \beta_1K_2K_{\text{W}}[\text{H}] + \beta_2\text{A}_{\text{tot}}\} - \text{ML}_{\text{tot}} - K_1[\text{H}]\text{ML}_{\text{tot}} - K_2[\text{H}]^2\text{ML}_{\text{tot}} = 0 \quad (9)$$

The solution of equation 9 is as follow:

$$[\text{ML}]_{\text{calc}} = \frac{(-\{-\beta_2\text{ML}_{\text{tot}} + 1 + K_1[\text{H}] + K_2[\text{H}]^2 + \beta_1[\text{OH}] + \beta_1K_1K_{\text{W}} + \beta_1K_2K_{\text{W}}[\text{H}] + \beta_2\text{A}_{\text{tot}}\} + (\{-\beta_2\text{ML}_{\text{tot}} + 1 + K_1[\text{H}] + K_2[\text{H}]^2 + \beta_1[\text{OH}] + \beta_1K_1K_{\text{W}} + \beta_1K_2K_{\text{W}}[\text{H}] + \beta_2\text{A}_{\text{tot}}\}^2 - 4 \cdot \{\beta_2 + \beta_1\beta_2[\text{OH}]\} \cdot \{-\text{ML}_{\text{tot}} - K_1[\text{H}]\text{ML}_{\text{tot}} - K_2[\text{H}]^2\text{ML}_{\text{tot}}\})^{1/2})}{2 \cdot \{\beta_2 + \beta_1\beta_2[\text{OH}]\}} \quad (10)$$

The  $[\text{ML}]_{\text{calc}}$  values were calculated by minimizing the sum (11)

$$\sum([\text{ML}]_{\text{calc}} - [\text{ML}]_{\text{exp}})^2 \quad (11)$$

where  $[\text{ML}]_{\text{exp}}$  is experimental values of  $[\text{ML}]$  complex concentration.





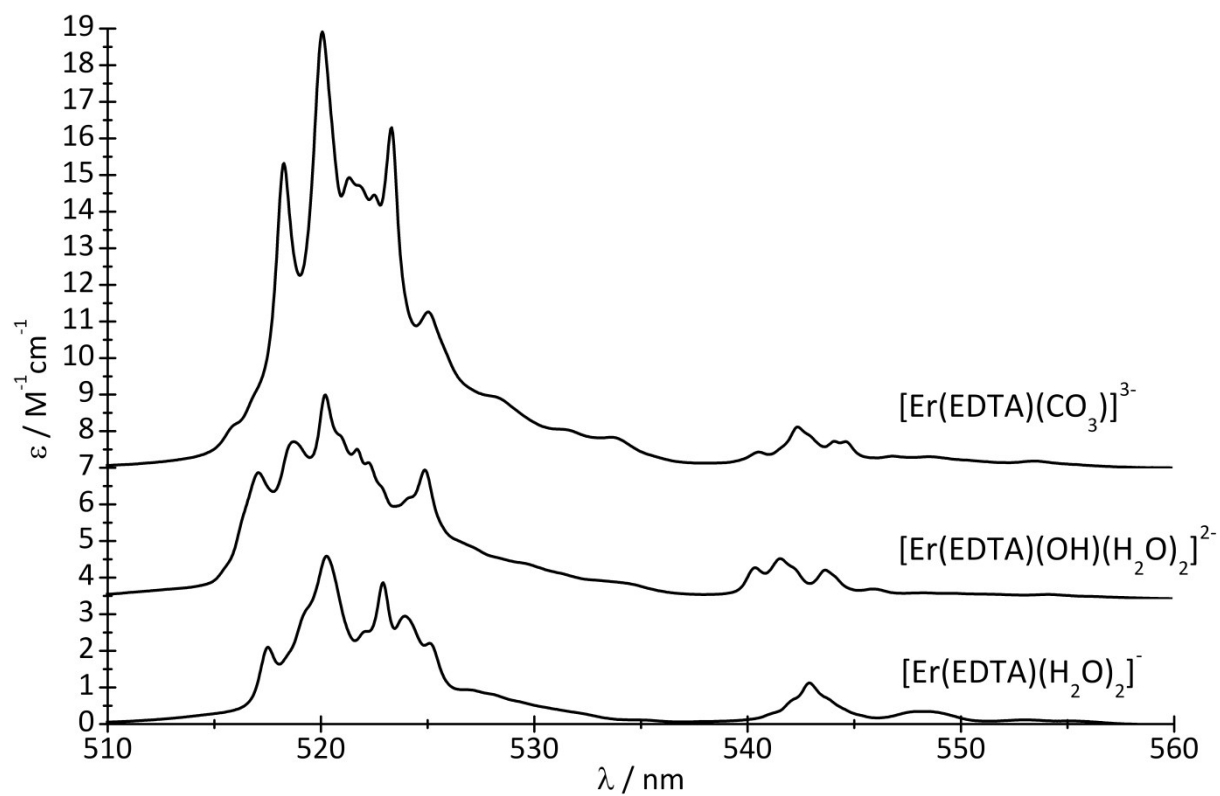

**Figure S2.** The  ${}^4I_{15/2} \rightarrow {}^2H_{11/2}$  and  ${}^4I_{15/2} \rightarrow {}^4S_{3/2}$  spectra of pure aqueous species:  $[\text{Er}(\text{EDTA})(\text{H}_2\text{O})_2]^-$ ,  $[\text{Er}(\text{EDTA})(\text{OH})(\text{H}_2\text{O})_2]^{2-}$  and  $[\text{Er}(\text{EDTA})(\text{H}_2\text{O})_2]^{3-}$  derived from the factor analysis<sup>10</sup> used for quantitative analysis of solutions.

**Table S5.** Experimental data taken for calculations of energy bonding  $\Delta E$ 

| Complex                                                                                                                                                                                                                                                         |                                      | Bond lengths<br>$\cdot 10^{10}$ [m] | $z_+$ | $z_-$           | E [J $\cdot$ mol $^{-1}$ ] | $\Sigma E$ [J $\cdot$ mol $^{-1}$ ] |
|-----------------------------------------------------------------------------------------------------------------------------------------------------------------------------------------------------------------------------------------------------------------|--------------------------------------|-------------------------------------|-------|-----------------|----------------------------|-------------------------------------|
| [Er(EDTA)(H <sub>2</sub> O) <sub>2</sub> ] <sup>-</sup>                                                                                                                                                                                                         | Er-OH <sub>2</sub>                   | 2.3445                              | 3     | 0               | -4040                      | -8080                               |
|                                                                                                                                                                                                                                                                 | Er-OH <sub>2</sub>                   | 2.3444                              | 3     | 0               | -4040                      |                                     |
| [Er(EDTA)(OH)(H <sub>2</sub> O) <sub>2</sub> ] <sup>2-</sup>                                                                                                                                                                                                    | Er-OH <sub>2</sub>                   | 2.5010                              | 3     | 0               | -3550                      | -30120                              |
|                                                                                                                                                                                                                                                                 | Er-OH <sub>2</sub>                   | 2.4260                              | 3     | 0               | -3770                      |                                     |
|                                                                                                                                                                                                                                                                 | Er-OH                                | 2.3293                              | 3     | -1              | -22800                     |                                     |
| [Er(EDTA)(CO <sub>3</sub> ) <sub>2</sub> ] <sup>3-</sup>                                                                                                                                                                                                        | Er-O(CO <sub>3</sub> <sup>2-</sup> ) | 2.3300                              | 3     | - $\frac{2}{3}$ | -15200                     | -30400                              |
|                                                                                                                                                                                                                                                                 | Er-O(CO <sub>3</sub> <sup>2-</sup> ) | 2.3280                              | 3     | - $\frac{2}{3}$ | -15200                     |                                     |
| [Th(EDTA)(H <sub>2</sub> O) <sub>4</sub> ]                                                                                                                                                                                                                      | Th-OH <sub>2</sub>                   | 2.4910                              | 4     | 0               | -4770                      | -18480                              |
|                                                                                                                                                                                                                                                                 | Th-OH <sub>2</sub>                   | 2.5230                              | 4     | 0               | -4650                      |                                     |
|                                                                                                                                                                                                                                                                 | Th-OH <sub>2</sub>                   | 2.5690                              | 4     | 0               | -4490                      |                                     |
|                                                                                                                                                                                                                                                                 | Th-OH <sub>2</sub>                   | 2.5460                              | 4     | 0               | -4570                      |                                     |
| [Th(EDTA)(CO <sub>3</sub> )(H <sub>2</sub> O) <sub>2</sub> ] <sup>2-</sup>                                                                                                                                                                                      | Th-OH <sub>2</sub>                   | 2.5323                              | 4     | 0               | -4620                      | -47640                              |
|                                                                                                                                                                                                                                                                 | Th-OH <sub>2</sub>                   | 2.5323                              | 4     | 0               | -4620                      |                                     |
|                                                                                                                                                                                                                                                                 | Th-O(CO <sub>3</sub> <sup>2-</sup> ) | 2.4538                              | 4     | - $\frac{2}{3}$ | -19200                     |                                     |
|                                                                                                                                                                                                                                                                 | Th-O(CO <sub>3</sub> <sup>2-</sup> ) | 2.4538                              | 4     | - $\frac{2}{3}$ | -19200                     |                                     |
| [Th(EDTA)(CO <sub>3</sub> ) <sub>2</sub> ] <sup>4-</sup>                                                                                                                                                                                                        | Th-O(CO <sub>3</sub> <sup>2-</sup> ) | 2.4390                              | 4     | - $\frac{2}{3}$ | -19300                     | -76900                              |
|                                                                                                                                                                                                                                                                 | Th-O(CO <sub>3</sub> <sup>2-</sup> ) | 2.4840                              | 4     | - $\frac{2}{3}$ | -19000                     |                                     |
|                                                                                                                                                                                                                                                                 | Th-O(CO <sub>3</sub> <sup>2-</sup> ) | 2.4310                              | 4     | - $\frac{2}{3}$ | -19400                     |                                     |
|                                                                                                                                                                                                                                                                 | Th-O(CO <sub>3</sub> <sup>2-</sup> ) | 2.4610                              | 4     | - $\frac{2}{3}$ | -19200                     |                                     |
| $\mu_{\text{H}_2\text{O}} = 6.7 \cdot 10^{-30}$ [C $\cdot$ m $^{-1}$ ]<br>$\epsilon_0 = 8.854 \cdot 10^{-12}$ [F $\cdot$ m $^{-1}$ ]<br>$\epsilon = 78.7$<br>$\theta = 0^\circ$<br>$e = 1.602 \cdot 10^{-19}$ [C]<br>$N_A = 6.022 \cdot 10^{23}$ [mol $^{-1}$ ] |                                      |                                     |       |                 |                            |                                     |

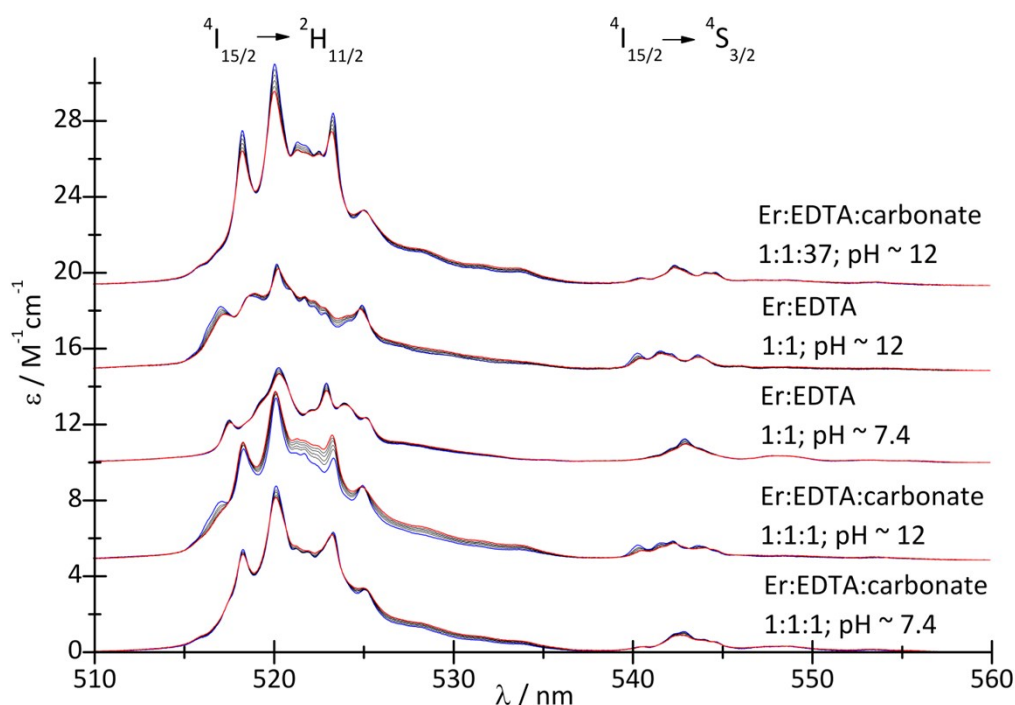

**Figure S3.** Absorption spectra of Er-EDTA-carbonate systems at different temperatures and pH. The spectra at low temperature (283K) are marked in blue. The highest temperature spectra (333K) are marked in red.

#### Determination of $\Delta G$ , $\Delta H$ and $\Delta S$ values of the of $[\text{Er}(\text{EDTA})(\text{CO}_3)]^{3-}$ complex formation

To study the temperature influence on spectral change of hypersensitive f-f transitions two effects should be taken into consideration: chemical reactions that occur in solution and / or physical effects connected with the changes of Boltzmann distribution of crystal field levels of electronic ground state and broadening of spectra lines due to dynamics effects. The latter physical effect may complicate the analysis of chemical reactions in solution seriously. The spectra of the  ${}^4I_{15/2} \rightarrow {}^2H_{11/2}$  and  ${}^4I_{15/2} \rightarrow {}^4S_{3/2}$  transitions have been measured of the following solutions at temperatures:

- (A) Er-EDTA 1:1 system at pH 7.4 as a model of  $[\text{Er}(\text{EDTA})(\text{H}_2\text{O})_2]^-$  species;
- (B) Er-EDTA 1:1 system at pH 12.6 as a model of  $[\text{Er}(\text{EDTA})(\text{OH})(\text{H}_2\text{O})_2]^{3-}$  species;
- (C) Er-EDTA-carbonate 1:1:37 at pH 12.6 as a model of  $[\text{Er}(\text{EDTA})(\text{CO}_3)]^{3-}$  species.

Due to low thermal stability of bicarbonates the reactions (1) and (2)

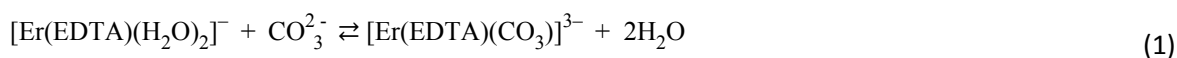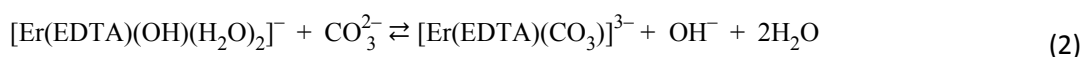

were studied in the temperature range between 283 and 333 K. The spectra of all these systems are presented in **Figure S3**. The weighted sum of the spectra of (A) and (C) was used to reproduce the spectra of the Er-EDTA-carbonate 1:1:1 systems at pH  $\sim 7.4$  at the given temperature and consequently to obtain the molar fractions of Er(III) species in reaction (1). In the same way the molar fractions of Er(III) equilibrium species in reaction (2) at pH  $\sim 12.6$  were determined combining the spectra of (B) and (C) with the spectra Er-EDTA-carbonate 1:1:1 systems at pH  $\sim 12.6$ .

Because the pH of solutions under study depend on the temperature the combined glass electrode with built in temperature sensor has been used for these measurements. The glass electrode has been calibrated at a given temperature using three secondary pH-standard solutions according to UPAC recommendations<sup>11</sup> and procedures described in ref. <sup>12</sup>.

**Table S6.** Empirical parameters used for  $pK_1$  and  $pK_2$  calculations of carbonic acid<sup>35</sup> at  $\mu_{\text{KCl}} = 3.5 \text{ M}$  ( $4.0 \text{ mol} \cdot \text{kg}^{-1}$ ) and  $pK_w$  for  $\text{H}_2\text{O}$  at different temperatures<sup>28</sup>

|     |         |          |          |     |          |        |
|-----|---------|----------|----------|-----|----------|--------|
| m   | $A_1$   | $B_1$    | $C_1$    | T   | $pK_1^*$ | $pK_1$ |
| 4.0 | 72.2986 | -3166.18 | -10.8732 | 281 | 6.48     | 6.21   |
| 4.0 | 72.2986 | -3166.18 | -10.8732 | 293 | 6.38     | 6.12   |
| 4.0 | 72.2986 | -3166.18 | -10.8732 | 303 | 6.33     | 6.05   |
| 4.0 | 72.2986 | -3166.18 | -10.8732 | 313 | 6.30     | 6.01   |
| 4.0 | 72.2986 | -3166.18 | -10.8732 | 323 | 6.29     | 5.97   |
| 4.0 | 72.2986 | -3166.18 | -10.8732 | 333 | 6.29     | 5.94   |
|     |         |          |          |     |          |        |
| m   | $A_2$   | $B_2$    | $C_2$    | T   | $pK_2^*$ | $pK_2$ |
| 4.0 | 79.604  | -3476.32 | -12.0692 | 281 | 10.52    | 9.71   |
| 4.0 | 79.604  | -3476.32 | -12.0692 | 293 | 10.37    | 9.57   |
| 4.0 | 79.604  | -3476.32 | -12.0692 | 303 | 10.30    | 9.47   |
| 4.0 | 79.604  | -3476.32 | -12.0692 | 313 | 10.23    | 9.38   |
| 4.0 | 79.604  | -3476.32 | -12.0692 | 323 | 10.18    | 9.30   |
| 4.0 | 79.604  | -3476.32 | -12.0692 | 333 | 10.15    | 9.22   |
|     |         |          |          |     |          |        |

The  $pK_1$  and  $pK_2$  values were calculated using the empirical equations taken from ref.<sup>13</sup>

$$pK_i^* - pK_i = A_i + B_i/T + C_i \ln T$$

$$A_1 = 35.2911m^{0.5} + 0.8491m - 0.32m^{1.5} + 0.055m^2$$

$$B_1 = -1583.09m^{0.5}$$

$$C_1 = -5.4366m^{0.5}$$

$$A_2 = 38.2746m^{0.5} + 1.6057m - 0.647m^{1.5} + 0.113m^2$$

$$B_2 = -1738.16m^{0.5}$$

$$C_2 = -6.0346m^{0.5}$$

where  $pK_i^*$  and are the values for solutions at zero ionic strengths at a given temperature (T).  $pK_i$  are the values for solutions at molality (m) at a given temperature. The results of calculations are presented in Table S5.

**Table S7.** Experimental values of quantities determined from UV-vis measurements of Er(III)-EDTA-carbonate solutions at different temperatures used to calculate the  $\Delta G$ ,  $\Delta H$  and  $\Delta S$  values of  $[\text{Er}(\text{EDTA})(\text{CO}_3)]^{3-}$  complex formation (where  $[\text{ML}] = [\text{Er}(\text{EDTA})(\text{H}_2\text{O})_2]$ ,  $[\text{MLA}] = [\text{Er}(\text{EDTA})(\text{CO}_3)]$ ,  $[\text{MLOH}] = [\text{Er}(\text{EDTA})(\text{OH})(\text{H}_2\text{O})_2]$ )

| T/K   | $A_{\text{tot}}/\text{M}$ | $M_{\text{tot}}/\text{M}$ | $[\text{ML}]/\text{M}$   | $[\text{MLA}]/\text{M}$ | pH    | $\text{pK}_1$ | $\text{pK}_2$ | $\text{pK}_w$ | $\Delta G/\text{J}\cdot\text{mol}^{-1}$ |
|-------|---------------------------|---------------------------|--------------------------|-------------------------|-------|---------------|---------------|---------------|-----------------------------------------|
| 281.9 | 0.05262                   | 0.05263                   | 0.02249                  | 0.03014                 | 7.76  | 9.69          | 15.89         | 14.69         | -2.01E+04                               |
| 294.5 | 0.05262                   | 0.05263                   | 0.02226                  | 0.03037                 | 7.63  | 9.55          | 15.66         | 14.20         | -2.10E+04                               |
| 303.5 | 0.05262                   | 0.05263                   | 0.02151                  | 0.03112                 | 7.60  | 9.46          | 15.52         | 13.90         | -2.15E+04                               |
| 312.9 | 0.05262                   | 0.05263                   | 0.02124                  | 0.03139                 | 7.53  | 9.38          | 15.38         | 13.56         | -2.22E+04                               |
| 322.5 | 0.05262                   | 0.05263                   | 0.02059                  | 0.03204                 | 7.52  | 9.30          | 15.26         | 13.24         | -2.27E+04                               |
| 331.2 | 0.05262                   | 0.05263                   | 0.02003                  | 0.03260                 | 7.51  | 9.23          | 15.16         | 12.98         | -2.31E+04                               |
| T/K   | $A_{\text{tot}}/\text{M}$ | $M_{\text{tot}}/\text{M}$ | $[\text{MLOH}]/\text{M}$ | $[\text{MLA}]/\text{M}$ | pH    | $\text{pK}_1$ | $\text{pK}_2$ | $\text{pK}_w$ | $\Delta G/\text{J}\cdot\text{mol}^{-1}$ |
| 280.9 | 0.05156                   | 0.05156                   | 0.03030                  | 0.02126                 | 12.95 | 9.70          | 15.89         | 14.69         | 1.98E+03                                |
| 294.0 | 0.05156                   | 0.05156                   | 0.02664                  | 0.02491                 | 12.50 | 9.56          | 15.66         | 14.20         | 8.54E+02                                |
| 302.5 | 0.05156                   | 0.05156                   | 0.02486                  | 0.02670                 | 12.20 | 9.47          | 15.52         | 13.90         | 3.51E+02                                |
| 312.8 | 0.05156                   | 0.05156                   | 0.02251                  | 0.02905                 | 12.04 | 9.38          | 15.38         | 13.56         | -1.42E+03                               |
| 323.4 | 0.05156                   | 0.05156                   | 0.02058                  | 0.03098                 | 11.62 | 9.29          | 15.26         | 13.24         | -1.55E+03                               |
| 332.5 | 0.05156                   | 0.05156                   | 0.01873                  | 0.03283                 | 11.40 | 9.22          | 15.16         | 12.98         | -2.52E+03                               |

## References

---

- 1 R. Janicki, A. Mondry, *Phys. Chem. Chem. Phys.*, 2014, **16** 26823–26831.
- 2 B. R. Judd, *Phys. Rev.*, 1962, **127**, 750–761.
- 3 G. S. Ofelt, *J. Chem. Phys.*, 1962, **37**, 511–519.
- 4 a) S. F. Mason, G. E. Tranter, *Chem. Phys. Lett.*, 1983, **94**, 29–33; b) S. F. Mason, *Inorg. Chim. Acta*, 1984, **94**, 313–322; c) R. D. Peacock, *Struct. Bonding*, Berlin, 1975, **22**, 83–219; d) S. F. Mason, *Struct. Bonding*, Berlin, 1980, **39**, 43–79; e) A. Mondry, P. Starynowicz, *J. Alloys Compd.*, 1995, **225**, 367–371.
- 5 a) C. K. Jørgensen, R. Reisfeld, *J. Less. Comm. Met.*, 1983, **93**, 107–112; b) D. E. Henrie, G. R. Choppin, *J. Chem. Phys.*, 1968, **49**, 477–481; c) D. E. Henrie, *Mol. Phys.* 1974, **28**, 415–421; d) Y. M. Poon, D. J. Newman, *J. Phys. C: Solid State Phys.* 1984, **17**, 4319–4325; e) M. Atanasov, C. Daul, H. U. Güdel, T. A. Wesolowski, M. Zbiri, *Inorg. Chem.*, 2005, **44**, 2954–2963; f) L. Petit, A. Borel, C. Daul, P. Maldivi, C. Adamo, *Inorg. Chem.*, 2006, **45**, 7382–7388.
- 6 a) C. K. Jørgensen, B. R. Judd, *Mol. Phys.*, 1964, **8**, 281–290; b) D. M. Gruen, C. W. DeKock, *J. Chem. Phys.*, 1966, **45**, 455–460.
- 7 a) S. F. Mason, *Inorg. Chim. Acta*, 1984, **94**, 313–322; b) C. Görller-Walrand, K. Binnemans in Handbook on the Physics and Chemistry of Rare Earths, Eds.: K. A. Gschneidner, Jr., L. Eyring), Elsevier, 1998, **25**, 101–264; c) R. Janicki, P. Starynowicz, A. Mondry, *Eur. J. Inorg. Chem.*, 2011, 3601–3616
- 8 C. K. Jørgensen, R. Reisfeld, *J. Less. Comm. Met.*, 1983, **93**, 107–112.
- 9 a) J. W. Rohleder, *Ann. Soc. Chim. Polonorum*, 1972, **46**, 2089–2097; b) B. W. N. Lo, *J. Phys. Chem. Solids* 1973, **34**, 513–520.
- 10 A. Rossberg, T. Reich and G. Bernhard, *Anal. Bioanal. Chem.*, 2003, **376**, 631.
- 11 R. P. Buck, S. Rondinini, A. K. Covington, F. G. K. Baucke, C. M. A. Brett, M. F. Camões, M. J. T. Milton, T. Mussini, R. Naumann, K. W. Pratt, P. Spitzer, G. S. Wilson, *Pure Appl. Chem.*, 2002, **74**, 2169–2200.
- 12 B. Modrzejewski, *Pomiary pH*, Wydawnictwo Naukowo Techniczne, Warszawa 1971.
- 13 F. Millero, F. Huang, T. Graham, D. Pierrot, *Geochim. Cosm. Acta*, 2007, **71**, 46–55.
